# Supplementary material
Source: publisher figshare collection journal article supplement (https://acs.figshare.com/ndownloader/files/4508956)

# **Proteome-wide Lysine Glutarylation Profiling of the *Mycobacterium tuberculosis* H37Rv**

Longxiang Xie <sup>a,†</sup>, Guirong Wang <sup>b,†</sup>, Zhaoxiao Yu <sup>a</sup>, Mingliang Zhou <sup>a</sup>, Qiming Li <sup>a</sup>, Hairong Huang <sup>b,\*</sup>, Jianping Xie <sup>a,\*</sup>

a. Institute of Modern Biopharmaceuticals, State Key Laboratory Breeding Base of Eco-Environment and Bio-Resource of the Three Gorges Area, Key Laboratory of Eco-environments in Three Gorges Reservoir Region, Ministry of Education, School of Life Sciences, Southwest University, Beibei, Chongqing, China. b. National Clinical Laboratory on Tuberculosis, Beijing Key laboratory for Drug-resistant Tuberculosis Research, Beijing Chest Hospital, Capital Medical University, Beijing Tuberculosis and Thoracic Tumor Institute, Beijing, China 101149;

Figure S1.(A) MS/MS spectra of a tryptic peptide ion TK(kg)PTSAGQADDALVR from Rv1347c; (B) MS/MS spectra of a tryptic peptide ion VEFEIGHSPK(kg)GPQATGVR from Rv3648c; (C) MS/MS spectra of a tryptic peptide ion PVPGWGSK(kg)RPR from Rv1259; (D) MS/MS spectra of a tryptic peptide ion K(kg)YTAPEISAR from dnak; (E) MS/MS spectra of a tryptic peptide ion K(kg)AIQSAMR from rpsC; (F) MS/MS spectra of a tryptic peptide ion HAK(kg)GWNHFLDR from Rv0576.

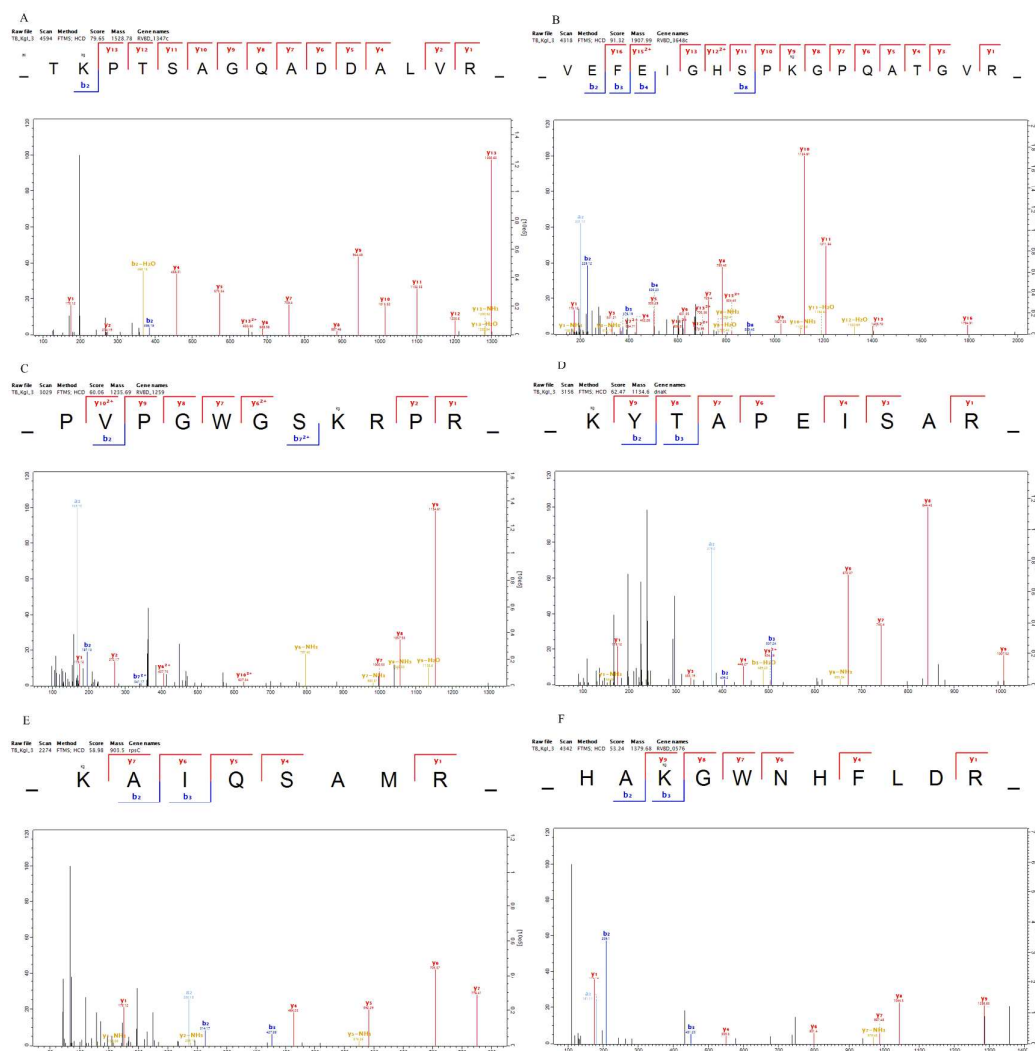

Supplement: Supplementary file 1 [file 4508956]
